# Generating minimum set of gRNA to cover multiple targets in multiple genomes with MINORg

Rachelle R.Q. Lee <sup>1</sup>, Wei Yuan Cher <sup>1</sup>, and Eunyoung Chae <sup>1\*</sup>

<sup>1</sup>Department of Biological Sciences, National University of Singapore, Singapore  
117558

\*Correspondence to Eunyoung Chae ([dbsce@nus.edu.sg](mailto:dbsce@nus.edu.sg))

March 2022

## Abstract

MINORg is an offline gRNA design tool that generates the smallest possible combination of gRNA capable of covering all desired targets in multiple non-reference genomes. As interest in pangenomic research grows, so does the workload required for large screens in multiple individuals. MINORg aims to lessen this workload by capitalising on sequence homology to favour multi-target gRNA while simultaneously screening multiple genetic backgrounds in order to generate reusable gRNA panels. We demonstrated the practical application of MINORg by knocking out a 11 homologous genes tandemly arrayed in a multigene cluster in two *Arabidopsis thaliana* lineages using three gRNA output by MINORg. Source code is freely available at <https://github.com/rlrq/MINORg>.

1 In functional genomics, gene function is frequently investigated using knockdown or knockout tech-  
2 niques and observing any changes to phenotype. The *clustered regularly interspaced short palindromic*  
3 *repeats-Cas* (CRISPR-Cas) system (Barrangou et al., 2007; Saprunauskas et al., 2011) has come to  
4 dominate the field of gene editing. Unlike older gene-editing tools such as zinc-finger nucleases (ZFN)  
5 (Bibikova et al., 2002) and transcription activator-like effector nucleases (TALEN) (Fujikawa et al., 2006)  
6 that recognise DNA motifs through their protein structures, CRISPR-Cas systems owe their specificity  
7 to a short guide RNA (gRNA) sequence that complementary base pairs with a target sequence. Conse-  
8 quently, the CRISPR-Cas system easily lends itself to multiplexing as only the gRNA has to be tailored  
9 for each target (Cong et al., 2013).

10 A pangenome is the genomic totality of a taxon, comprising the core genome shared by all individu-  
11 als in a given taxon and dispensable genes which are found in only a subset of individuals (Medini et al.,  
12 2020). Falling costs and increasing availability of whole-genome sequencing have made the study of  
13 pangenomes more attractive and widespread (Jayakodi et al., 2021; Miga and Wang, 2021; Tranchant-  
14 Dubreuil et al., 2019; Anani et al., 2020). Thus, it is now possible to investigate the function of genes  
15 across various genetic backgrounds rather than a single reference genome. However, intraspecific vari-  
16 ation in target and background sequences may alter the ability of a single gRNA to direct a CRISPR-Cas  
17 construct to a desired genomic destination as well as the likelihood of off-target effects in non-reference  
18 individuals.

19 Existing gRNA design tools rarely account for intraspecific variation in non-reference genomes,  
20 and, where they do, off-target effects are usually only checked against a single genetic background  
21 (sometimes together with a reference genome). Furthermore, the experimental burden of designing  
22 and cloning separately designed gRNA for multiple genes in multiple genomes may render large pan-  
23 genomic screens tedious, which highlights the need for gRNA design tools to be able to generate a  
24 minimum gRNA set capable of covering all desired targets in the pan-genome era. Recent tools such  
25 as MultiTargeter (Prykhozhiy et al., 2015), which designs minimum gRNA for multiple targets, Guide-  
26 Maker (Poudel et al., 2021), which designs gRNA in non-reference genomes, and CRISPR-Local (Sun  
27 et al., 2019), which designs minimum gRNA for multiple targets in non-reference genomes on a per-  
28 genome basis, address some but not all of these considerations.

29 Therefore, we have created MINORg to take into account all of these limitations simultaneously  
30 and output minimum gRNA sets that cover all desired targets in all desired backgrounds. Additionally,  
31 MINORg also allows users to infer homologues in unannotated non-reference genomes and define them  
32 as targets, as well as design gRNA in user-specified protein domains or gene features (such as the 5'  
33 untranslated region (UTR)).

## 34 **Results**

### 35 **MINORg algorithm**

36 MINORg consists broadly of four different steps: 1. Identification of orthologues of desired genes in  
37 non-reference genomes, 2. Generation of all possible gRNA from sequences output by step 1, 3.  
38 Filtering of candidate gRNA for on-target and off-target specificity, 4. Generation of a minimum set of  
39 gRNA that can target sequences output by step 1 (Fig. 1). Each of the four steps can also be executed  
40 independently to facilitate parameter optimisation.

41 The first step of orthologue identification is based on local BLAST (Altschul et al., 1990; Camacho  
42 et al., 2009). It executes BLASTN locally using reference genes as query and non-reference genomes  
43 as subject, merges hits within a certain allowable distance, and filters for minimum length and percent-  
44 age identity to reference genes. All these parameters can be tuned by the user based on the rate of  
45 polymorphisms of their set of genes. Users may additionally restrict the search to a specific protein  
46 domain using a Reverse Position-Specific BLAST (RPS-BLAST) database and specifying the domain's  
47 position-specific scoring matrix (PSSM) ID. The output of this step is a set of sequences that the tool  
48 will attempt to generate gRNA for. Users who already have the sequences they intend to target may  
49 skip this discovery step.

50 The second step is the most straightforward. Based on a user-provided PAM pattern and gRNA  
51 length, all possible gRNA will be generated from all sequences output by step 1. We have implemented a  
52 flexible method of defining PAM. It allows for upstream PAM, spacer length not equal to one, ambiguous  
53 bases, and/or PAM-less gRNA identification. This implementation uses a stripped-down version of  
54 regular expressions. We believe it is important to make a gRNA tool agnostic to any CRISPR-Cas  
55 system to both cater to a variety of systems available now and also to future proof the MINORg to future  
56 CRISPR-Cas technologies.

57 The third step employs three main gRNA filters: 1. GC content, 2. Off-target effects, 3. Within  
58 feature. GC content filtering is straightforward, with default minimum and maximum GC content set  
59 at 0.3 and 0.7, although both are user-adjustable. Off-target effects are assessed by the presence of  
60 gRNA sequences outside of target regions. Unlike gRNA off-target assessment in currently available  
61 tools, Primer-BLAST (Ye et al., 2012) will be employed to search for such regions for each gRNA in both  
62 the reference genome and the non-reference genome provided to the tool for orthologue discovery in  
63 step 1. The user may also provide a custom set of sequences to be screened against. Thirdly, gRNA  
64 will be filtered for their presence within desired features, such as CDS and 5' UTR. For non-reference  
65 targets that were discovered by the first step in unannotated genomes, we infer the ranges of desired  
66 features from alignments with reference genes using MAFFT (Kato and Standley, 2013) and retain  
67 only gRNA that can target at least one such non-reference sequence in a region that aligns with at least  
68 one reference gene's desired region. This step outputs a mapping file that maps gRNA to their location  
69 on targets and tracks the pass/fail status of these filters.

70 Finally, the fourth step employs a set cover algorithm called List and Remove (Yang et al., 2015)  
71 to identify one (or however many requested by the user) minimum gRNA set required to target all se-

72 quences output by step 1. This step produces the best results when targets share sequence homology.  
73 For gRNA with equivalent coverage, the gRNA that is closest to the 5' end of a target sequence will be  
74 prioritised unless users specify otherwise.

## 75 **Multi-target edits in T<sub>1</sub> generation of two *Arabidopsis thaliana* accessions using** 76 **three gRNA**

77 To validate the utility of gRNA output by MINORg, we attempted to knock out 13 homologous genes in  
78 two *Arabidopsis thaliana* lineages (also known as accessions; accessions TueWa1-2 and KZ10) using  
79 gRNA generated by MINORg. *RESISTANCE TO POWDERY MILDEW 8 (RPW8)* and *HOMOLOG*  
80 *OF RPW8 (HR)* are immune genes in *A. thaliana* that comprise a physical cluster conferring broad-  
81 spectrum resistance to powdery mildew (Xiao et al., 2001). The composition and number of *RPW8/HR*  
82 cluster members vary wildly between different *A. thaliana* accessions (Barragan et al., 2019) due to a  
83 history of duplication and diversifying selection (Xiao et al., 2004). In fact, the reference genome of the  
84 *A. thaliana* accession Col-0 lacks *RPW8* genes entirely. These features make the *RPW8/HR4* cluster  
85 ideal for testing MINORg-generated gRNA for multiple homologous genes in multiple individuals.

86 Using MINORg, we designed two mutually exclusive gRNA sets that are separately able to cover a  
87 subset of the *RPW8/HR* cluster consisting of all *RPW8* genes as well as *HR4* (henceforth collectively  
88 referred to as *RPW8/HR4*) in accessions TueWa1-2 and KZ10. TueWa1-2 has ten *RPW8/HR4* genes  
89 while KZ10 has three *RPW8* genes and no *HR4*. Both accessions also possess paralogous *HR1/2/3*  
90 genes within their *RPW8/HR* clusters, which serve as potential off-target risk. As neither accession has  
91 had its full genome sequenced, we performed an off-target assessment in the reference Col-0 genome,  
92 taking care to mask *HR4*, which is the only target gene also present in Col-0.

93 We subcloned six gRNAs (set1: gRNA\_1022, gRNA\_1023, and gRNA\_1027 and set 2:  
94 gRNA\_1033, gRNA\_1034, and gRNA\_1035) individually into CRISPR-Cas9 vectors, which were in turn  
95 transformed in individual plants. TueWa1-2 is known to have low transformation efficiency (Wu et al.,  
96 2018) and we obtained very few ( $n < 3$ ) or no T<sub>1</sub> plant transformants for gRNA\_1022, gRNA\_1027  
97 and gRNA\_1035; the few positive plant transformants did not have their genomes edited. The re-  
98 maining gRNAs, although from different MINORg sets, was still able to target all TueWa1-2 and KZ10  
99 *RPW8/HR4* genes. Specifically, gRNA\_1033, which targets *RPW8.2/8.3* homologs, targeted six genes  
100 in TueWa1-2 (*RPW8.3a/3c'/2a/3b/2b/3c*) and two genes in KZ10 (*RPW8.2/8.3*). gRNA\_1023 targets  
101 *RPW8.1* homologs, which were three genes (*RPW8.1a/1a\_1/1b*) in TueWa1-2 and *RPW8.1* in KZ10.  
102 Lastly, gRNA\_1034 specifically edited *HR4* in TueWa1-2, a gene that is missing in KZ10. The analysis  
103 for editing efficiency at 11/13 loci was completed (for the remaining two loci, *RPW8.2b* and *RPW8.3c* in  
104 TueWa1-2, deep-sequencing failed as primers designed for them amplified their homologs instead).

105 Overall, our deep-sequencing data revealed that 10 out of 11 genes were edited beyond 90%  
106 and the gene most resistant to editing (*RPW8.3b*) had an individual with 68% of the reads edited  
107 (Fig. 2A). For individuals transformed with a gRNA targeting multiple genes (i.e. gRNA\_1033 and  
108 gRNA\_1023), we observed multiple genes edited within the same individual (Fig. 2B). Most impres-

109 sively, for TueWa1-2 plant 8 with gRNA\_1023, all three *RPW8.1* homologs were edited beyond 99%  
110 (Fig. 2B). For gRNA\_1033, we observed TueWa1-2 plant 7 which had > 92% editing efficiency at three  
111 genes (*RPW8.3a/3c/3b*); *RPW8.2a* was unfortunately edited at 7.54% but was edited at 68% in an-  
112 other individual, plant 6. For KZ10, editing efficiency was generally high (Fig. 2B). We obtained only  
113 one transgenic plant for KZ10 with gRNA\_1023, but the editing of *RPW8.1* was successful (99.3%).  
114 Three plants were obtained for KZ10 with gRNA\_1033, which targeted two genes, and the mean editing  
115 efficiency was 90%.

## 116 **Pangenomic gRNA design for orthologues in 64 *A. thaliana* accessions using** 117 **non-NGG PAM**

118 We designed gRNA for *TIR-NBS3* (*TN3*; accession ID AT1G66090), an nucleotide-binding leucine-rich  
119 repeat (NLR) immune gene, in 64 *A. thaliana* accessions using the panNLRome resource published by  
120 (Van de Weyer et al., 2019). This resource was generated using resistance gene enrichment sequenc-  
121 ing (RenSeq) of 64 diverse *A. thaliana* accessions and is to date the most comprehensive inventory of  
122 NLRs for *A. thaliana*. Using MINORg, we queried Van de Weyer et al.'s (2019) dataset and identified  
123 orthologues of *TN3* in 51 of the 64 accessions, one accession of which (accession MNF-Che-2) had  
124 two homologues. We asked MINORg to design up to five sets of gRNA for Cas12a (Cpf-1) (Zetsche  
125 et al., 2015) systems to target the moderately conserved catalytic nucleotide-binding domain (found in  
126 APAF-1 [apoptotic protease-activating factor 1], R proteins, and CED-4 [*Caenorhabditis elegans* death  
127 4 protein] (van der Biezen and Jones, 1998)) (NB-ARC) (Fig. 3A), making sure we included the full  
128 panNLRome dataset as well as the reference genome for off-target assessment.

129 Upon manual inspection of the inferred targets, we noticed that one of MNF-Che-2's homologues had  
130 six different frameshift indels, suggesting that it is non-functional. We removed this homologue from the  
131 mapping file that MINORg output. As it is inconsequential whether this non-functional homologue is  
132 cleaved by a gRNA targeting functional *TN3* homologues, we did not execute the 'filter' subcommand to  
133 reassess off-target effects with this homologue as background for the updated list of targets. Using the  
134 modified mapping file, we executed the 'minimumset' subcommand to regenerate gRNA sets based on  
135 this smaller set of targets, and asked MINORg to prioritise non-redundancy within sets over proximity to  
136 the 5' end. The first two sets output by MINORg comprised only of two gRNA each, while the rest had  
137 three gRNA (Fig. 3B, Table S1). This exemplifies MINORg's ability to identify minimal gRNA panels that  
138 are nevertheless suitable for species-wide screens in a large number of lineages.

## 139 **Cross-species gRNA design for orthologues in three *Arabidopsis* species**

140 We designed gRNA for *ACTIVATED DISEASE RESISTANCE 1* (*ADR1*; accession ID AT1G33560) and  
141 *N REQUIREMENT GENE 1.1* (*NRG1.1*; accession ID AT5G66900), another *A. thaliana* immune genes,  
142 as well as their highly conserved orthologues in two other *Arabidopsis* species, *Arabidopsis lyrata* and  
143 *Arabidopsis halleri*. We asked MINORg to design up to three mutually exclusive gRNA sets within  
144 coding regions for each gene and its orthologues, and MINORg output three sets containing one gRNA

145 covering all three orthologues for both *ADR1* (Table S2) and *NRG1.1* (Table S3). Figure 4 shows  
146 candidate gRNA for *ADR1* and its homologues Araha.3012s0003 (*A. halleri*) and AL1G47950 (*A. lyrata*),  
147 as well as the three gRNA output by MINORg that are each capable of targeting all three orthologues.  
148 MINORg notably favours not only high coverage gRNA but also gRNA closer to the 5' end in order to  
149 increase the likelihood that indels would have deleterious effects. By demonstrating MINORg's ability to  
150 design inter-specific gRNA in addition to intra-specific gRNA (Fig. 2), we show that MINORg is highly  
151 flexible and can be used to design gRNA for diverse CRISPR experimental designs.

## 152 Discussion

153 In the pan-genome era, the research community has access to a continually updated database of  
154 non-reference genomes. Currently, in *A. thaliana*, the contig-level assemblies of the panNLRome of 64  
155 accessions Van de Weyer et al. (2019) are publicly available. In response to the demand of pan-genome  
156 tools, particularly in the functional investigation of gene or their clusters in non-reference genomes, we  
157 wrote MINORg, a powerful and versatile tool that facilitates inter-accession, multi-gene and minimal set  
158 gRNA design. We tested the minimal set targeting on 13 *RPW8/HR4* genes across two accessions and  
159 confirmed the successful editing in 11 of them with the expected multi-gene targeting within the same  
160 individuals observed.

161 In plants with a gRNA (i.e. gRNA\_1033/ gRNA\_1023) targeting multiple genes, we observed high  
162 T<sub>1</sub> editing efficiency of single genes (Fig. 2). Our data indicate that a single gRNA can be used to  
163 target as many as four genes of which we can expect three to be highly edited in T<sub>1</sub> somatic cells.  
164 As the level of mosaicism in T<sub>1</sub> plants is strongly correlated to the proportion of T<sub>2</sub> and T<sub>3</sub> homozygous  
165 progenies (Wolabu et al., 2020; Kim et al., 2021), it is likely that our genome edits are transgenerational.  
166 It is pertinent that the number of genes we can target is not limited by MINORg, but rather the wet lab  
167 genome editing tools used. It is known that Cas9 is the limiting factor in plant multiplex applications  
168 (Verhage, 2021). To overcome this, it is possible to create a multiplex construct with higher Cas9  
169 expression (Castel et al., 2019) which likely increases the probability of getting more genes highly  
170 edited within the same genome.

171 We have thus shown that MINORg can be used to generate sets of a small number of gRNA ca-  
172 pable of targeting a larger number of homologous genes in multiple genetic backgrounds within the  
173 same species. Additionally, we also demonstrated that MINORg can be used to design gRNA for inter-  
174 species orthologues. In the absence of genome sequencing data for non-reference individuals of a  
175 species, users may take advantage of MINORg's prioritisation of high coverage gRNA to design inter-  
176 species gRNA of orthologous genes in reference genomes of closely related species, as the conserved  
177 regions targeted by gRNA with high inter-species coverage are likely also conserved in those non-  
178 reference individuals. All this further illustrates MINORg's versatility to investigate genes not present in  
179 the reference genome.

180 In sum, MINORg is a flexible gRNA design tool ideal for the pan-genome era, as it accounts for  
181 both sequence variation as well as genetic background. In Figure 5, we provide a flowchart of the

182 basic functionalities of MINORg to give an idea of how MINORg can be customised to design gRNA for  
183 multiple targets with sequence homology in multiple genomes.

## 184 **Code Availability**

185 Source code is freely available at: <https://github.com/rlrq/MINORg>. Documentation, including tutorial  
186 and more detailed overview of sub-command algorithms, can be found at: <https://rlrq.github.io/MINORg>.  
187 MINORg can be installed via Python's package installer pip from the TestPyPI repository under the  
188 package name 'minorg'.

## 189 **Methods**

### 190 **Resources**

191 Software and algorithms used in MINORg and this manuscript are listed in Table 1.

### 192 **Design of gRNA for CRISPR-Cas9 knock-out of *RPW8/HR4* genes**

193 We selected two accessions, TueWa1-2 (CS10002) and KZ10 (CS22442) as a testbed for the capa-  
194 bility of MINORg to design gRNAs for [1] Col-0 homologs present and [2] absent in Col-0 [3] across  
195 non-reference genomes [4] with a minimum number of gRNAs to target an entire cluster of genes. With  
196 MINORg, we designed minimum sets of gRNAs targeting *RPW8/HR4* genes in the two accessions (Bar-  
197 ragan et al., 2019) after obtaining cluster sequence and annotations from NCBI's Nucleotide database  
198 (accessions MK598747.1 (TueWa1-2) and KJ634211.1 (KZ10)). The following command was used to  
199 run MINORg:

```
200     minorg --extend-cds KZ10_TueWa1-2_RPW8HR4.CDS.fasta \  
201           --extend-gene KZ10_TueWa1-2_RPW8HR4.gene.fasta \  
202           --gene KZ10_RPW8.1,KZ10_RPW8.2,KZ10_RPW8.3 \  
203           --gene TueWa1-2_RPW8.1,TueWa1-2_RPW8.1a,TueWa1-2_RPW8.1b \  
204           --gene TueWa1-2_RPW8.1a_1,TueWa1-2_RPW8.2a,TueWa1-2_RPW8.2b \  
205           --gene TueWa1-2_RPW8.3a,TueWa1-2_RPW8.3b,TueWa1-2_RPW8.3c \  
206           --gene TueWa1-2_RPW8.3clike,TueWa1-2_HR4 \  
207           --indv ref \  
208           --background <path to FASTA of KJ634211.1 sequence> \  
209           --background <path to FASTA of MK598747.1 sequence> \  
210           --assembly <path to TAIR10 FASTA assembly> \  
211           --annotation <path to TAIR10 GFF3 annotation> \  
212           --screen-ref --mask-gene AT3G50480 \  
213           --set 10 --length 19
```



214 As there are no GFF3 annotations for the cluster for either KZ10 or TueWa1-2, we used "--extend-  
215 cds" and "--extend-gene" to temporarily add the cluster genes of both accessions to the reference  
216 assembly and annotation. These files were manually curated from MK598747.1 and KJ634211.1  
217 sequences and annotations and can be found at [https://github.com/rlrq/MINORg/publication\\_data](https://github.com/rlrq/MINORg/publication_data).  
218 Using "--gene", we then specified our target genes, and "--indv" specifies that the genes are  
219 in the reference genome. The genomic sequences for the full *RPW8/HR* clusters (including  
220 paralogous *HR1/2/3* which were not included in our target genes) were supplied for off-target  
221 screening using "--background". "--assembly" and "--annotation" together specify the reference  
222 *A. thaliana* genome (TAIR10; GenBank assembly accession GCA\_000001735.2; retrieved from  
223 [https://www.ncbi.nlm.nih.gov/assembly/GCF\\_000001735.4](https://www.ncbi.nlm.nih.gov/assembly/GCF_000001735.4)), while "--screen-ref" informs MINORg to  
224 also screen the reference genome for off-targets. "--mask-gene" hides *HR4* (accession ID AT3G50480)  
225 in the reference genome from the off-target filter as its orthologues in TueWa1-2 and KZ10 are target  
226 genes. Finally, "--length" specifies gRNA length, and "--set" determines how many mutually exclusive  
227 gRNA sets to generate. All other parameters (including 3' NGG PAM, restricting gRNA to CDS regions,  
228 and  $30\% \leq GC \leq 70\%$ ) were left as default.

## 229 **Molecular cloning and plant transformation**

230 We selected two sets of gRNA output by MINORg for further experiments. The subcloning of gRNAs into  
231 CRISPR-Cas9 vector pKI-1.1R (Tsutsui and Higashiyama, 2017) are detailed in our subcloning protocol  
232 (Supplementary Methods). Subcloned vectors were transformed into *Agrobacterium tumefaciens* strain  
233 GV3103 and subsequently into TueWa1-2 and KZ10. To eliminate the possibility of the off-targeting of  
234 one gRNA editing the target of another gRNA, each plant individual was transformed with a CRISPR-  
235 Cas9 vector containing only one gRNA. The T1 generation was sown on  $\frac{1}{2}$  MS plates with hygromycin  
236 (15  $\mu\text{g}/\text{mL}$ ). Leaf tissues were harvested from resistant plants, and genomic DNA was extracted with  
237 Edwards buffer (Edwards et al., 1991).

## 238 **Deep-sequencing and analysis of NGS reads**

239 We assessed the editing status of each *RPW8/HR* locus by deep-sequencing via Illumina iSeq 100.  
240 The procedure involves three rounds of PCR: [1] The first PCR generated an amplicon sized 526 - 2254  
241 bp flanking the CRISPR-Cas9 cleavage site. Primers for the first PCR aims to amplify as few *RPW8/HR*  
242 members as possible (ideally, one but it is not always possible if the homologs are identical, especially at  
243 Primer3-optimal sites). [2] Next, the second PCR amplified a 250-280 bp region covering the cleavage  
244 site for each *RPW8/HR* member. The second PCR primers consist of 5' adapter sequences to which  
245 the [3] primers of the third PCR binds to append iSeq index sequences. All gRNA and primer sequences  
246 are deposited in Table S4.

247 In TueWa1-2, members of *RPW8.1* and *RPW8.2* are duplicated and the remaining *RPW8* members  
248 share high sequence similarity even in intergenic regions. With a large number of *RPW8* members  
249 (10 genes in TueWa1-2), the manual design of theoretically optimized primers that specifically amplify

250 each gene is challenging. In addition, specific primers were not always available, thus at certain re-  
251 gions, the first or second PCR amplicons generated may consist of sequences of two or more *RPW8*  
252 members. In such cases, the next acceptable solution was to use polymorphic sites to differentiate the  
253 amplicons/NGS reads per gene. For every MINORg-mediated CRISPR-Cas experiment, we foresee  
254 this complex process of primer design on a continuous genome is repeated for each new gene cluster  
255 targeted, which indicates that this tedious work can be automated to significantly save time.

256 To solve the primer design issue, we wrote and used a programme called “PRIMERg”  
257 (<https://github.com/CherWeiYuan/primerg>). PRIMERg takes a list of gRNA and a genomic template  
258 sequence and returns primers for the first and second PCR. Primers provided by PRIMERg are opti-  
259 mized by primer3 and filtered, if possible, by the specificity within the user-supplied genomic template.  
260 The specificity of these primers was checked by a homebrewed algorithm based on the Primer-BLAST  
261 algorithm Ye et al. (2012). The uniqueness (whether there are distinctive SNP(s) present in the desired  
262 amplicon) for each primer is checked by string matching against the user-supplied genomic template.

263 For certain genes, specific first PCR primers cannot be designed, hence we rely on the uniqueness  
264 of each amplicon to differentiate the reads from different genes. Such unique SNPs can be detected by  
265 aligning the desired and undesired amplicons. For our case, in TueWa1-2, the region flanking *RPW8.1a*  
266 + *RPW8.3b* and *RPW8.1a\_1* + *RPW8.3c* is highly similar and all suitable primer3-optimized primer  
267 pairs amplified the two regions, each consisting of two genes. To obtain the reads for *RPW8.3b*, we  
268 wrote a Python function to select reads with the signature of *RPW8.3b* (“gtgaacgtcttaag”, not present  
269 in *RPW8.1a/8.1a\_1* or *RPW8.3c*), with an allowance of 1-bp mismatch to account for sequencing error  
270 ([https://github.com/CherWeiYuan/SNP\\_Filtering](https://github.com/CherWeiYuan/SNP_Filtering)). We then mapped the filtered reads to the amplicon  
271 and visualized the results using IGV Thorvaldsdóttir et al. (2013) to check for any discrepancies (e.g.  
272 unexpected SNPs that suggest undesired amplicons are also mapped). The clean reads were input to  
273 CRISPResso2 Clement et al. (2019) [settings: “Minimum average read quality (phred33 scale)” > 30,  
274 “Minimum single bp quality (phred33 scale)” > 10] to acquire the percentage of modified reads in the  
275 sample.

276 To increase the number of samples we include per run in our iSeq 100, we allowed amplicons from  
277 different genes to share the same sample indexes. The desired amplicon was also selected from the  
278 pool of amplicons with the same index via the presence of unique SNPs before IGV mapping and  
279 CRISPResso2 analysis as described above. More specifically, to select TueWa1-2 *RPW8.3a* reads  
280 without KZ10 *RPW8.3* reads, we filtered R1 reads by “aatagaatacat” and R2 reads by “acaatcgat”. To  
281 select TueWa1-2 *RPW8.2b* reads without KZ10 *RPW8.3* reads, we filtered the R1 reads by “gttctcaagg”.

## 282 **Design of pangenomic Cas12a gRNA for the NB-ARC domain of *TN3* using MI-** 283 **NORg**

284 We retrieved the RenSeq data generated by Van de Weyer et al. (2019) from  
285 [http://ftp.tuebingen.mp.de/ebib/alkeller/pan\\_NLRome/](http://ftp.tuebingen.mp.de/ebib/alkeller/pan_NLRome/). To design gRNA for *TN3* orthologues in  
286 the panNLRome, we ran the following code:

```
287     minorg --gene AT1G66090 \  
288           --indv all --genome-set vdw_nlrome.txt \  
289           --domain 366375 --db <path to Cdd v3.18 database> \  
290           --minid 90 --mincdslen 500 \  
291           --check-ecip \  
292           --assembly <path to TAIR10 FASTA assembly> \  
293           --annotation <path to TAIR10 GFF3 annotation> \  
294           --pam Cas12a --screen-ref \  
295           --thread 5
```

296 Using "--gene", we specified AT1G66090 (*TN3*'s gene ID) as our target gene. "--genome-set" tells  
297 MINORg the location of a lookup file that maps aliases to query FASTA files, which in this case are  
298 the contig-level assemblies of the panNLRome of 64 *A. thaliana* accessions, and "--indv all" indicates  
299 that all FASTA files listed in the lookup file are to be queried. A template of "vdw\_nlrome.txt" can  
300 be found at [https://github.com/rlrq/MINORg/publication\\_data](https://github.com/rlrq/MINORg/publication_data). "--db" specifies the path to a local CDD  
301 database (version 3.18; previously retrieved from <ftp://ftp.ncbi.nih.gov/pub/mmdb/cdd/cdd.tar.gz> but has  
302 since been superseded by version 3.19), and "--domain" specifies the position-specific scoring matrix  
303 (PSSM) ID of the domain to be targeted, which in this example is the NB-ARC domain. "--minid", "-  
304 -mincdslen", and "--check-ecip" are parameters that control homologue discovery. With "--pam", we  
305 specified the 5' TTTV PAM of Cas12a (Kim et al., 2017), and "--thread" informs the maximum number  
306 of parallel processes. All other parameters (20 bp gRNA length, restricting gRNA to CDS regions, and  
307  $30\% \leq GC \leq 70\%$ ) were left as default.

308 After removing all entries for the potentially non-functional MNF-Che-2 homologue of *TN3* from the  
309 mapping file (ending in '\_gRNA\_all.map') output by MINORg, we used the following code to regenerate  
310 gRNA sets for the reduced list of targets:

```
311     minorg minimumset --map <modified mapping file> \  
312                       --prioritise -nr \  
313                       --set 5
```

314 "--prioritise-nr" tells MINORg to prioritise non-redundancy over proximity to 5' end when generating  
315 gRNA sets.

## 316 **Phylogenetic inference of NB-ARC domains of *TN3* orthologues**

317 In the course of executing MINORg for the generation of pangenomic gRNA sets for *TN3*, an alignment  
318 of non-reference targets with reference genes was generated by MAFFT (Kato and Standley, 2013).  
319 We fed this alignment to FastTree (Price et al., 2010) using default parameters to generate a maximum-  
320 likelihood tree.

## 321 **Design of inter-species gRNA for *ADR1* and *NRG1.1* using MINORg**

322 We retrieved reference genome assemblies and GFF3 annotations for *A. thaliana*  
323 (TAIR10), *A. lyrata* (version 2.1; GenBank assembly accession GCA\_000004255.1; re-  
324 trieved from [ftp://ftp.ensemblgenomes.org/pub/plants/release-45/fasta/arabidopsis\\_lyrata](ftp://ftp.ensemblgenomes.org/pub/plants/release-45/fasta/arabidopsis_lyrata)),  
325 and *A. halleri* (version 1.1; retrieved from [https://data.jgi.doe.gov/refine-](https://data.jgi.doe.gov/refine-download/phytozome?organism=Ahalleri&expanded=264)  
326 [download/phytozome?organism=Ahalleri&expanded=264](https://data.jgi.doe.gov/refine-download/phytozome?organism=Ahalleri&expanded=264)), and ran the following code:

```
327     minorg --gene AT1G33560,AL1G47950.v2.1,Araha.3012s0003.v1.1 \  
328           --indv ref \  
329           --reference --set arabidopsis_genomes.txt \  
330           --reference TAIR10, araly2, araha1 \  
331           --screen-ref --set 3
```

332 Using "--gene", we specified the gene IDs of our target genes (AT1G33560 is the gene ID for *ADR1*  
333 in *A. thaliana*, AL1G47950.v2.1 in *A. lyrata*, and Araha.3012s0003.v1.1 in *A. halleri*). "--reference-  
334 set" tells MINORg the location of a lookup file that maps reference genome aliases to assembly and  
335 annotation combinations, while "--reference" specifies the aliases of reference genomes to use. All  
336 other parameters (including 3' NGG PAM, 20 bp gRNA length, restricting gRNA to CDS regions, and  
337  $30\% \leq GC \leq 70\%$ ) were left as default.

338 The above code was repeated using "--gene AT5G66900,AL8G44500.v2.1,Araha.11408s0003.v1.1"  
339 to generate gRNA targeting *NRG1.1* orthologues, where AT5G66900, AL8G44500.v2.1, and  
340 Araha.11408s0003.v1.1 are gene IDs for *NRG1.1* in *A. thaliana*, *A. lyrata*, and *A. halleri* respectively.

## 341 **Acknowledgements**

342 We thank Dr. Greg Tucker-Kellogg for advising on the code. We also extend our appreciation to all who  
343 ran MINORg at the National University of Singapore for their invaluable feedback on the code before  
344 publication. This work is supported by the the Ministry of Education, Singapore under its Academic  
345 Research Fund (MOE2019-T2-1-134) and by Singapore National Research Foundation under its Com-  
346 petitive Research Programme (NRF-CRP22-2019-0001). The funders had no role in study design, data  
347 collection and analysis, decision to publish, or preparation of the article. Any opinions, findings and  
348 conclusions or recommendations expressed in this material are those of the author(s) and do not reflect  
349 the views of the funders.

## 350 **Author Contributions**

351 E.C. conceived and conceptualised the project. R.R.Q.L. designed and developed the programme and  
352 W.Y.C. performed the experiments. All three authors wrote and proofread the manuscript and approved  
353 the final version.

## 354 Figures and tables

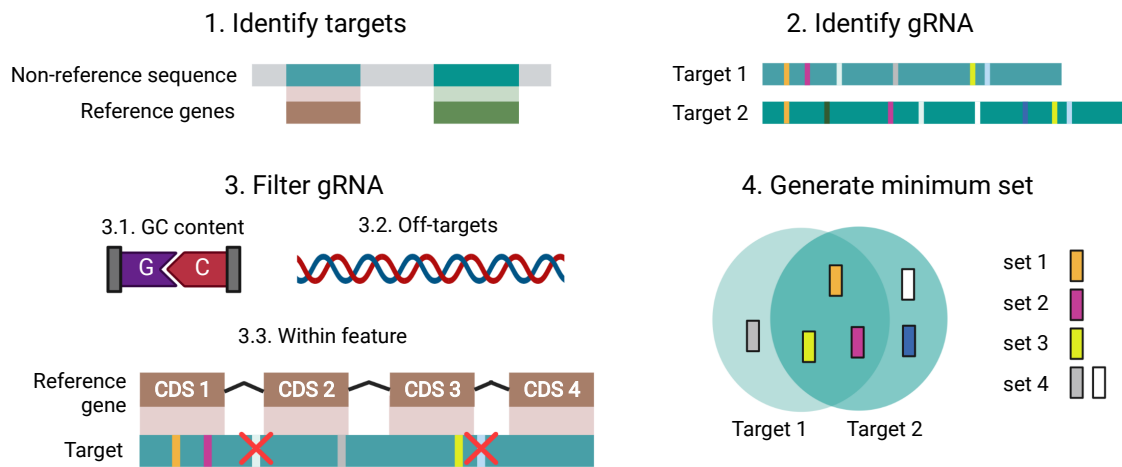

**Figure 1. MINORg overview.** The full programme consists of four steps. In step 1, gRNA targets are identified by BLASTN of reference genes to non-reference genomes. The targets are represented in green. This step will be skipped if a user directly supplies their desired target sequences, or if only reference genes are targeted. In step 2, gRNA are generated from target sequences identified in step 1. Each unique gRNA sequence is represented with a different colour. In step 3, gRNA are filtered by GC content, off-target effects, as well as whether they are found within a desired feature. If gene annotations have been provided, gRNA are removed if they do not fall within reference gene CDS regions after alignment of targets with reference genes. Finally, in step 4, minimum gRNA sets are generated, with the goal of covering all targets using the least number of gRNA.

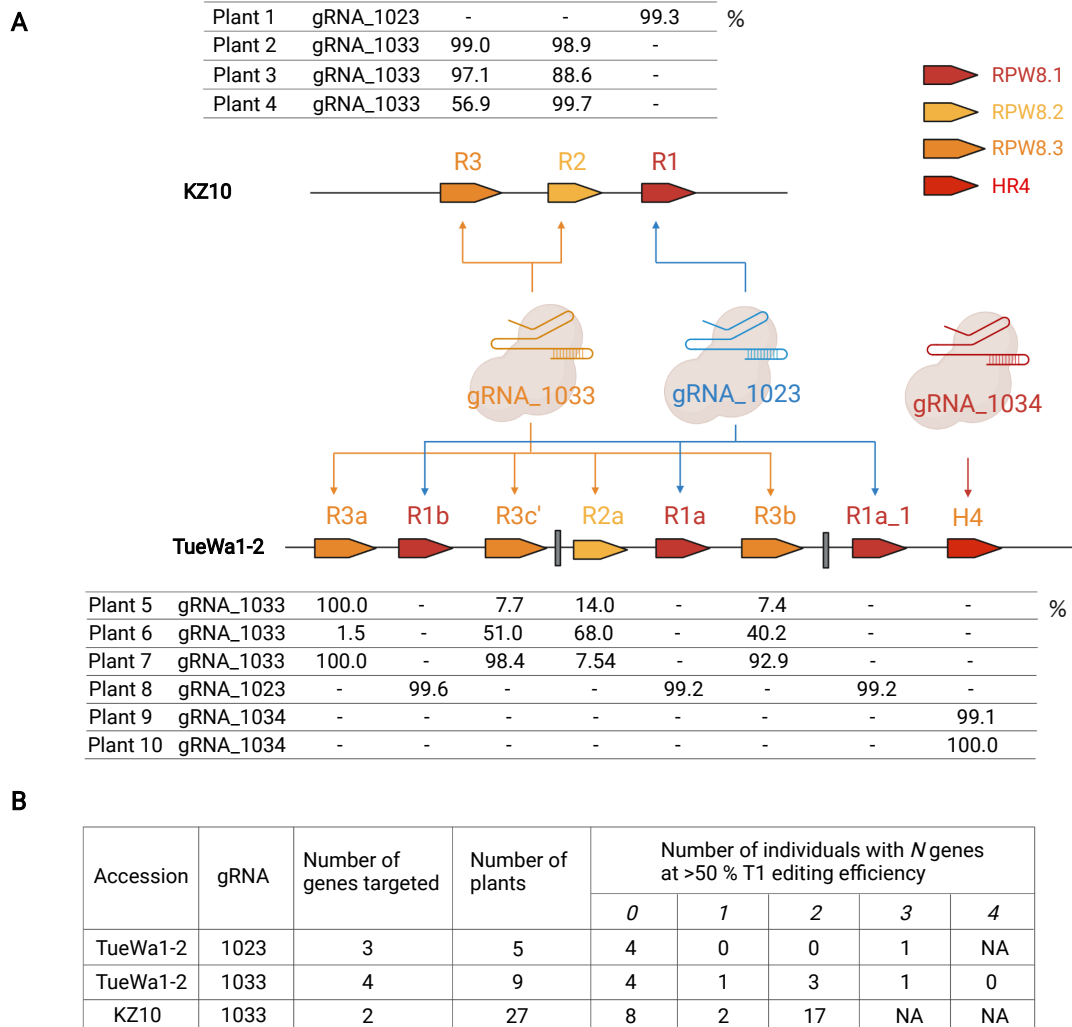

**Figure 2. Editing efficiency of multi-gene targeting in T<sub>1</sub> plants. (A)** Summary of gRNAs and their RPW8/HR4 targets in TueWa1-2 and KZ10. Every plant individual was transformed with a CRISPR-Cas9 vector containing one gRNA. The table show the percent of NGS reads that were modified as reported in CRISPResso2. Not shown are *RPW8.2b* and *RPW8.3c*, two of ten TueWa1-2 targets, for which deep sequencing failed. **(B)** Editing efficiency in T<sub>1</sub> plants.

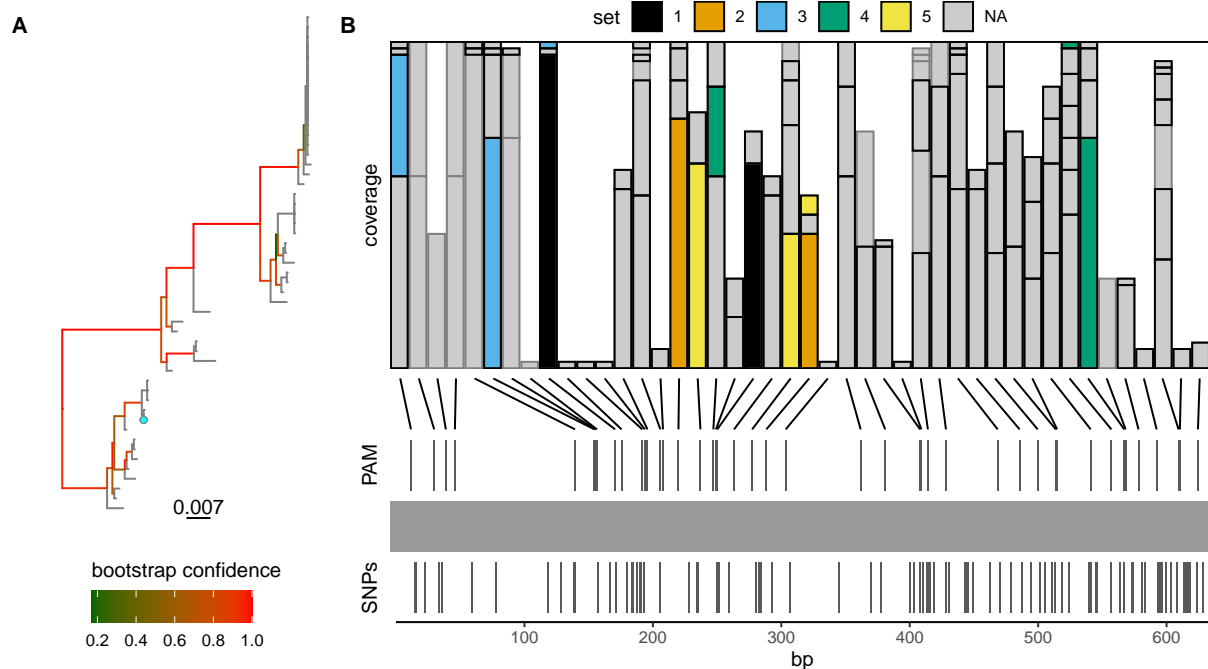

**Figure 3. MINORg generates small sets of gRNA for pan-genomic coverage of the NB-ARC domain of *TN3* in 51 *A. thaliana* accessions. (A)** Maximum-likelihood tree of the genomic sequence of the NB-ARC domain of *TN3* orthologues in 51 *A. thaliana* accessions. The NB-ARC domain is contained within a single exon in all accessions. The reference accession, Col-0, is indicated in cyan. **(B)** Coverage of all possible Cas12a gRNA (5' TTTV PAM) for the NB-ARC domain of 51 *TN3* orthologues in 51 accessions. gRNAs that share the same PAM site are stacked. The height of each bar represents the number of targets covered by a gRNA. The horizontal line marks the maximum coverage of targets per PAM site, which is 51 targets. gRNAs that passed all checks (GC content, off-target, and within CDS) are outlined in black, and those that failed at least one check are outlined in grey. Five mutually exclusive sets were requested, with priority given to non-redundancy, and the final selection of gRNAs is coloured by set. Each set is capable of covering all 51 targets.

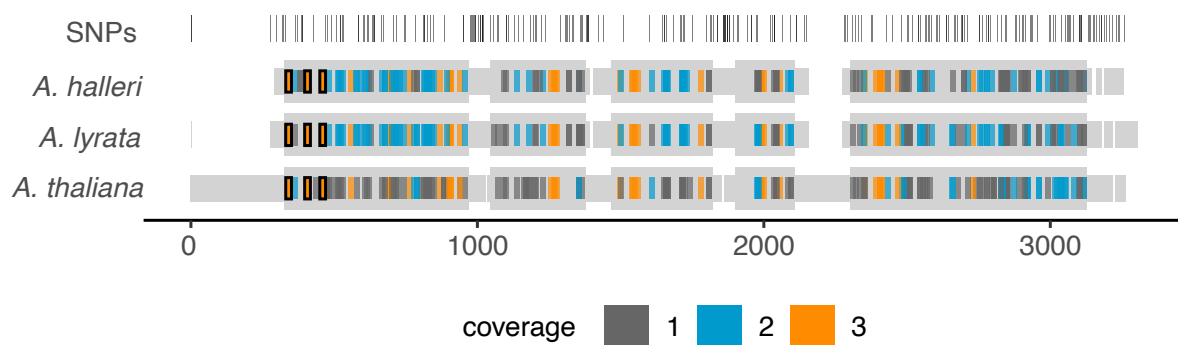

**Figure 4. MINORg favours high coverage gRNA towards the 5' end of ADR1 and its orthologues in three Arabidopsis species.** Multiple sequence alignment of genes Araha.3012s0003.v1.1 (*A. halleri*), AL1G47950.v2.1 (*A. lyrata*), and ADR1 (*A. thaliana*) is shown in grey, with thicker sections representing coding regions. Single nucleotide polymorphisms (SNPs) are indicated in the first row. All candidate gRNA generated by MINORg within CDS regions that have passed off-target checks and contain GC content between 30% and 70% are shown along each gene. The colour of each gRNA corresponds with the number of orthologues it is capable of targeting. Three sets of gRNA were requested, and MINORg output three mutually exclusive sets that each contained only a single gRNA capable of covering all three orthologues. These three gRNA are outlined in black.



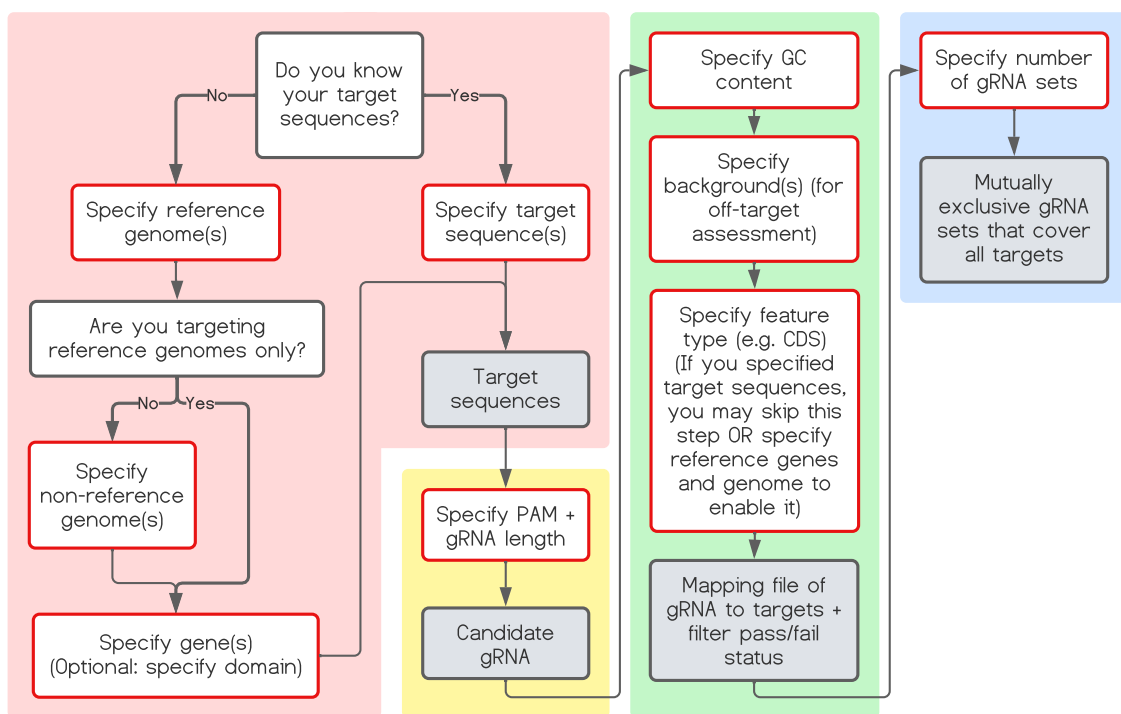

**Figure 5. MINORg parameter selection flowchart.** The flowchart is separated into 4 sections by background colour that correspond to each of the four main steps of MINORg described in Figure 1: target identification (pink), gRNA identification (yellow), gRNA filtering (green), and generation of minimum set (blue). Boxes outlined in red describe parameters to use, and boxes with grey fill are the output of each step.

**Table 1.** Resource table

| RESOURCE                           | SOURCE                                                                                      | IDENTIFIER      |
|------------------------------------|---------------------------------------------------------------------------------------------|-----------------|
| Software and Algorithms in MINORg  |                                                                                             |                 |
| Python 3                           | (Van Rossum and Drake, 2009)                                                                |                 |
| Biopython                          | (Cock et al., 2009)                                                                         |                 |
| pyfaidx                            | (Shirley et al., 2015)                                                                      |                 |
| Typer                              | <a href="https://github.com/tiangolo/typer">https://github.com/tiangolo/typer</a>           |                 |
| Pybedtools                         | (Dale et al., 2011)                                                                         | RRID:SCR_021018 |
| BLAST+                             | (Camacho et al., 2009)                                                                      |                 |
| BEDTools                           | (Quinlan and Hall, 2010)                                                                    | RRID:SCR_006646 |
| MAFFT                              | (Kato and Standley, 2013)                                                                   | RRID:SCR_011811 |
| List and Remove (LAR)              | (Yang et al., 2015)                                                                         |                 |
| Software and Algorithms in PRIMERg |                                                                                             |                 |
| PRIMERg                            | <a href="https://github.com/CherWeiYuan/primerg">https://github.com/CherWeiYuan/primerg</a> |                 |
| Python 3                           | (Van Rossum and Drake, 2009)                                                                |                 |
| Biopython                          | (Cock et al., 2009)                                                                         |                 |
| BLAST+                             | (Camacho et al., 2009)                                                                      |                 |
| Primer-BLAST                       | (Ye et al., 2012)                                                                           |                 |
| Primer3                            | (Untergasser et al., 2012)                                                                  | RRID:SCR_003139 |
| Pandas                             | (McKinney, 2010)                                                                            |                 |

## 355 **References**

- 356 Altschul, S. F., Gish, W., Miller, W., Myers, E. W. and Lipman, D. J. (1990). Basic local alignment search  
357 tool. *Journal of molecular biology* *215*, 403–10.
- 358 Anani, H., Zgheib, R., Hasni, I., Raoult, D. and Fournier, P.-E. (2020). Interest of bacterial pangenome  
359 analyses in clinical microbiology. *Microbial Pathogenesis* *149*, 104275.
- 360 Barragan, C. A., Wu, R., Kim, S. T., Xi, W., Habring, A., Hagmann, J., Van de Weyer, A. L., Zaidem,  
361 M., Ho, W. W. H., Wang, G., Bezrukov, I., Weigel, D. and Chae, E. (2019). RPW8/HR repeats control  
362 NLR activation in *Arabidopsis thaliana*. *PLoS Genetics* *15*, 1–21.
- 363 Barrangou, R., Fremaux, C., Deveau, H., Richards, M., Boyaval, P., Moineau, S., Romero, D. A. and  
364 Horvath, P. (2007). CRISPR provides acquired resistance against viruses in prokaryotes. *Science*  
365 (New York, N.Y.) *315*, 1709–1712.
- 366 Bibikova, M., Golic, M., Golic, K. G. and Carroll, D. (2002). Targeted chromosomal cleavage and muta-  
367 genesis in *Drosophila* using zinc-finger nucleases. *Genetics* *161*, 1169–1175.
- 368 Camacho, C., Coulouris, G., Avagyan, V., Ma, N., Papadopoulos, J., Bealer, K. and Madden, T. L.  
369 (2009). BLAST+: Architecture and applications. *BMC Bioinformatics* *10*, 1–9.
- 370 Castel, B., Tomlinson, L., Locci, F., Yang, Y. and Jones, J. D. (2019). Optimization of T-DNA architecture  
371 for Cas9-mediated mutagenesis in *Arabidopsis*. *PLoS ONE* *14*, 1–20.
- 372 Clement, K., Rees, H., Canver, M. C., Gehrke, J. M., Farouni, R., Hsu, J. Y., Cole, M. A., Liu, D. R.,  
373 Joung, J. K., Bauer, D. E. and Pinello, L. (2019). CRISPResso2 provides accurate and rapid genome  
374 editing sequence analysis. *Nature Biotechnology* *37*, 224–226.
- 375 Cock, P. J., Antao, T., Chang, J. T., Chapman, B. A., Cox, C. J., Dalke, A., Friedberg, I., Hamelryck,  
376 T., Kauff, F., Wilczynski, B. and De Hoon, M. J. (2009). Biopython: Freely available Python tools for  
377 computational molecular biology and bioinformatics. *Bioinformatics* *25*, 1422–1423.
- 378 Cong, L., Ran, F. A., Cox, D., Lin, S., Barretto, R., Habib, N., Hsu, P. D., Wu, X., Jiang, W., Marraffini,  
379 L. A. and Zhang, F. (2013). Multiplex Genome Engineering Using CRISPR/Cas Systems. *Science*  
380 *339*, 819–823.
- 381 Dale, R. K., Pedersen, B. S. and Quinlan, A. R. (2011). Pybedtools: a flexible Python library for manip-  
382 ulating genomic datasets and annotations. *Bioinformatics* *27*, 3423–3424.
- 383 Edwards, K., Johnstone, C. and Thompson, C. (1991). A simple and rapid method for the preparation  
384 of plant genomic DNA for PCR analysis. *Nucleic Acids Research* *19*, 1349.
- 385 Fujikawa, T., Ishihara, H., Leach, J. E. and Tsuyumu, S. (2006). Suppression of defense response in  
386 plants by the *avrBs3/pthA* gene family of *Xanthomonas* spp. *Molecular plant-microbe interactions* :  
387 *MPMI* *19*, 342–349.

- 388 Jayakodi, M., Schreiber, M., Stein, N. and Mascher, M. (2021). Building pan-genome infrastructures for  
389 crop plants and their use in association genetics. *DNA research : an international journal for rapid*  
390 *publication of reports on genes and genomes* 28, 1–9.
- 391 Katoh, K. and Standley, D. M. (2013). MAFFT multiple sequence alignment software version 7: Im-  
392 provements in performance and usability. *Molecular Biology and Evolution* 30, 772–780.
- 393 Kim, H. K., Song, M., Lee, J., Menon, A. V., Jung, S., Kang, Y. M., Choi, J. W., Woo, E., Koh, H. C.,  
394 Nam, J. W. and Kim, H. (2017). In vivo high-throughput profiling of CRISPR-Cpf1 activity. *Nature*  
395 *Methods* 14, 153–159.
- 396 Kim, S. T., Choi, M., Bae, S. J. and Kim, J. S. (2021). The functional association of *acqos/victr* with  
397 salt stress resistance in *arabidopsis thaliana* was confirmed by crispr-mediated mutagenesis. *Inter-*  
398 *national Journal of Molecular Sciences* 22.
- 399 McKinney, W. (2010). Data Structures for Statistical Computing in Python. In *Proceedings of the 9th*  
400 *Python in Science Conference*, (van der Walt, S. and Millman, J., eds), pp. 56–61,.
- 401 Medini, D., Donati, C., Rappuoli, R. and Tettlin, H. (2020). The Pangenome: A Data-Driven Discovery  
402 in Biology. In *The Pangenome*, (Tettlin, H. and Medini, D., eds),. Springer, Cham.
- 403 Miga, K. H. and Wang, T. (2021). The Need for a Human Pangenome Reference Sequence. *Annual*  
404 *Review of Genomics and Human Genetics* 22, 81–102.
- 405 Poudel, R., Rodriguez, L. T., Reisch, C. and Rivers, A. R. (2021). GuideMaker: Software to design  
406 CRISPR-Cas guide RNA pools in non-model genomes. *bioRxiv* .
- 407 Price, M. N., Dehal, P. S. and Arkin, A. P. (2010). FastTree 2 - Approximately maximum-likelihood trees  
408 for large alignments. *PLoS ONE* 5.
- 409 Prykhozhiy, S. V., Rajan, V., Gaston, D. and Berman, J. N. (2015). CRISPR multitargeter: A web tool  
410 to find common and unique CRISPR single guide RNA targets in a set of similar sequences. *PLoS*  
411 *ONE* 10, 1–18.
- 412 Quinlan, A. R. and Hall, I. M. (2010). BEDTools: a flexible suite of utilities for comparing genomic  
413 features. *Bioinformatics* 26, 841–842.
- 414 Sapranauskas, R., Gasiunas, G., Fremaux, C., Barrangou, R., Horvath, P. and Siksnys, V. (2011). The  
415 *Streptococcus thermophilus* CRISPR/Cas system provides immunity in *Escherichia coli*. *Nucleic acids*  
416 *research* 39, 9275–9282.
- 417 Shirley, M. D., Ma, Z., Pedersen, B. S. and Wheelan, S. J. (2015). Efficient "pythonic" access to FASTA  
418 files using pyfaidx. *PeerJ PrePrints* 3, e970v1.
- 419 Sun, J., Liu, H., Liu, J., Cheng, S., Peng, Y., Zhang, Q., Yan, J., Liu, H. J. and Chen, L. L. (2019).  
420 CRISPR-Local: A local single-guide RNA (sgRNA) design tool for non-reference plant genomes.  
421 *Bioinformatics* 35, 2501–2503.

- 422 Thorvaldsdóttir, H., Robinson, J. T. and Mesirov, J. P. (2013). Integrative Genomics Viewer (IGV): High-  
423 performance genomics data visualization and exploration. *Briefings in Bioinformatics* *14*, 178–192.
- 424 Tranchant-Dubreuil, C., Rouard, M. and Sabot, F. (2019). Plant pangenome: Impacts on phenotypes  
425 and evolution. *Annual Plant Reviews Online* *2*, 453–478.
- 426 Tsutsui, H. and Higashiyama, T. (2017). PKAMA-ITACHI vectors for highly efficient CRISPR/Cas9-  
427 mediated gene knockout in *Arabidopsis thaliana*. *Plant and Cell Physiology* *58*, 46–56.
- 428 Untergasser, A., Cutcutache, I., Koressaar, T., Ye, J., Faircloth, B. C., Remm, M. and Rozen, S. G.  
429 (2012). Primer3—new capabilities and interfaces. *Nucleic acids research* *40*, e115–e115.
- 430 Van de Weyer, A. L., Monteiro, F., Furzer, O. J., Nishimura, M. T., Cevik, V., Witek, K., Jones, J. D.,  
431 Dangl, J. L., Weigel, D. and Bemm, F. (2019). A Species-Wide Inventory of NLR Genes and Alleles  
432 in *Arabidopsis thaliana*. *Cell* *178*, 1260–1272.
- 433 van der Biezen, E. A. and Jones, J. D. (1998). The NB-ARC domain: a novel signalling motif shared by  
434 plant resistance gene products and regulators of cell death in animals.
- 435 Van Rossum, G. and Drake, F. L. (2009). *Python 3 Reference Manual*. CreateSpace, Scotts Valley, CA.
- 436 Verhage, L. (2021). Twelve genes at one blow: multiplex genome editing with CRISPR/Cas. *Plant*  
437 *Journal* *106*, 6–7.
- 438 Wolabu, T. W., Park, J. J., Chen, M., Cong, L., Ge, Y., Jiang, Q., Debnath, S., Li, G., Wen, J. and Wang,  
439 Z. (2020). Improving the genome editing efficiency of CRISPR/Cas9 in *Arabidopsis* and *Medicago*  
440 *truncatula*. *Planta* *252*, 1–14.
- 441 Wu, R., Lucke, M., ting Jang, Y., Zhu, W., Symeonidi, E., Wang, C., Fitz, J., Xi, W., Schwab, R. and  
442 Weigel, D. (2018). An efficient CRISPR vector toolbox for engineering large deletions in *Arabidopsis*  
443 *thaliana*. *Plant Methods* *14*.
- 444 Xiao, S., Ellwood, S., Calis, O., Patrick, E., Li, T., Coleman, M. and Turner, J. G. (2001). Broad-spectrum  
445 mildew resistance in *Arabidopsis thaliana* mediated by RPW8. *Science* *291*, 118–120.
- 446 Xiao, S., Emerson, B., Ratanasut, K., Patrick, E., O'Neill, C., Bancroft, I. and Turner, J. G. (2004). Origin  
447 and maintenance of a broad-spectrum disease resistance locus in *Arabidopsis*. *Molecular Biology*  
448 *and Evolution* *21*, 1661–1672.
- 449 Yang, Q., Nofsinger, A., Mcpeek, J., Phinney, J. and Knuesel, R. (2015). A Complete Solution to the Set  
450 Covering Problem. In *International Conference on Scientific Computing (CSC)* pp. 36–41,.
- 451 Ye, J., Coulouris, G., Zaretskaya, I., Cutcutache, I., Rozen, S. and Madden, T. L. (2012). Primer-BLAST:  
452 a tool to design target-specific primers for polymerase chain reaction. *BMC bioinformatics* *13*, 134.
- 453 Zetsche, B., Gootenberg, J. S., Abudayyeh, O. O., Slaymaker, I. M., Makarova, K. S., Essletzbichler,  
454 P., Volz, S. E., Joung, J., Van Der Oost, J., Regev, A., Koonin, E. V. and Zhang, F. (2015). Cpf1 Is a  
455 Single RNA-Guided Endonuclease of a Class 2 CRISPR-Cas System. *Cell* *163*, 759–771.
